# Supplementary material
Source: MDPI journal article supplement (https://www.mdpi.com/1999-4907/14/11/2116)
Supplement: s1 [file s1]

# Supplementary Information

For

## Assessing the potential of urban trees to accumulate potentially toxic elements: a network approach

Marija Matić<sup>1</sup>, Dragana Pavlović<sup>1,\*</sup>, Veljko Perović<sup>1</sup>, Olga Kostić<sup>1</sup>, Dragan Čakmak<sup>1</sup>, Miroslava  
Mitrović<sup>1</sup>, Pavle Pavlović<sup>1</sup>

<sup>1</sup> Department of Ecology, Institute for Biological Research 'Siniša Stanković', University of Belgrade,  
Bulevar despota Stefana 142, 11060 Belgrade, Serbia

\* Corresponding author: E-mail: dragana.pavlovic@ibiss.bg.ac.rs

Tel: +38111 2078358

Fax: +381 11 2761433

### Tables:

**Table S1.** Potentially toxic elements concentrations (PTEs) in the leaves of selected urban tree species (mg kg<sup>-1</sup> d.w.), average and standard deviation (Std Dev).

**Table S2.** Pearson's correlations between the content of PTEs in leaves and the ecophysiological response of the studied species.

**Table S3.** Content of Chl a, Chl b, Chl a+b, Chl a/b and Tot Carot (mg g<sup>-1</sup> d.w.) and photosynthetic efficiency (Fv/Fm) of selected urban tree species, average and standard deviation (Std Dev).

**Table S1.** Potentially toxic elements concentrations (PTEs) in the leaves of selected urban tree species (mg kg<sup>-1</sup> d.w.), average and standard deviation (Std Dev).

| Tree species             | Sampling sites    | Al            | B             | Cr          | Cu          | Fe            | Mn            | Ni             | Pb             | Sr           | Zn            |
|--------------------------|-------------------|---------------|---------------|-------------|-------------|---------------|---------------|----------------|----------------|--------------|---------------|
| <i>A. platanoides</i>    | Pancevo           | 204.30        | 56.85         | 1.60        | 6.42        | 275.42        | 92.36         | 0.54           | 0.53           | 30.58        | 18.47         |
|                          | Smederevo         | 124.62        | 106.55        | 2.24        | 7.06        | 274.36        | 31.98         | 0.46           | 0.29           | 39.05        | 16.16         |
|                          | Obrenovac         | 124.41        | 77.80         | 2.27        | 6.10        | 161.87        | 26.92         | 0.61           | 0.32           | 47.80        | 18.88         |
|                          | Belgrade I        | 155.98        | 130.66        | 1.07        | 6.77        | 181.24        | 345.86        | 0.65           | 0.37           | 140.07       | 22.13         |
|                          | Belgrade II       | 124.74        | 60.93         | 2.50        | 6.37        | 170.66        | 66.49         | 0.63           | 0.47           | 56.65        | 30.56         |
| <b>Average</b>           | <b>Study area</b> | <b>146.81</b> | <b>86.56</b>  | <b>1.94</b> | <b>6.54</b> | <b>212.71</b> | <b>112.72</b> | <b>0.58</b>    | <b>0.40</b>    | <b>62.83</b> | <b>21.24</b>  |
| <b>Std Dev</b>           |                   | <b>34.90</b>  | <b>31.47</b>  | <b>0.59</b> | <b>0.38</b> | <b>57.18</b>  | <b>133.03</b> | <b>0.08</b>    | <b>0.10</b>    | <b>44.26</b> | <b>5.63</b>   |
| <i>A. pseudoplatanus</i> | Pancevo           | 130.52        | 88.35         | 0.35        | 5.71        | 182.35        | 114.24        | 0.47           | 0.39           | 43.18        | 27.46         |
|                          | Smederevo         | 103.37        | 143.13        | 0.66        | 3.86        | 216.78        | 88.76         | 0.51           | 0.32           | 68.48        | 20.35         |
|                          | Obrenovac         | 138.27        | 93.29         | 1.47        | 10.61       | 163.22        | 23.12         | 0.61           | 0.32           | 39.87        | 28.72         |
|                          | Belgrade I        | 299.85        | 73.72         | 0.88        | 15.73       | 488.63        | 62.43         | 0.77           | 0.77           | 64.09        | 42.86         |
|                          | Belgrade II       | 144.36        | 81.34         | 2.01        | 7.34        | 220.83        | 60.93         | 0.64           | 0.37           | 54.56        | 26.80         |
| <b>Average</b>           | <b>Study area</b> | <b>163.28</b> | <b>95.97</b>  | <b>1.07</b> | <b>8.65</b> | <b>254.36</b> | <b>69.89</b>  | <b>0.60</b>    | <b>0.43</b>    | <b>54.04</b> | <b>29.24</b>  |
| <b>Std Dev</b>           |                   | <b>77.94</b>  | <b>27.38</b>  | <b>0.66</b> | <b>4.67</b> | <b>133.15</b> | <b>34.08</b>  | <b>0.12</b>    | <b>0.19</b>    | <b>12.54</b> | <b>8.28</b>   |
| <i>B. pendula</i>        | Pancevo           | 112.08        | 46.78         | 1.09        | 4.21        | 137.05        | 88.73         | < dl           | < dl           | 30.78        | 31.36         |
|                          | Smederevo         | 114.25        | 144.09        | 1.25        | 3.88        | 253.12        | 30.11         | < dl           | < dl           | 38.39        | 45.30         |
|                          | Obrenovac         | 180.72        | 65.36         | 1.53        | 4.55        | 196.30        | 21.67         | < dl           | < dl           | 35.76        | 36.45         |
|                          | Belgrade I        | 151.28        | 238.28        | 0.93        | 4.86        | 168.00        | 25.72         | < dl           | < dl           | 48.74        | 292.20        |
|                          | Belgrade II       | 96.42         | 73.09         | 1.82        | 4.77        | 125.96        | 35.05         | < dl           | < dl           | 29.19        | 35.32         |
| <b>Average</b>           | <b>Study area</b> | <b>130.95</b> | <b>113.52</b> | <b>1.32</b> | <b>4.45</b> | <b>176.09</b> | <b>40.25</b>  | <b>&lt; dl</b> | <b>&lt; dl</b> | <b>36.57</b> | <b>88.12</b>  |
| <b>Std Dev</b>           |                   | <b>34.35</b>  | <b>78.91</b>  | <b>0.35</b> | <b>0.41</b> | <b>51.10</b>  | <b>27.55</b>  | <b>0.00</b>    | <b>0.00</b>    | <b>7.75</b>  | <b>114.19</b> |
| <i>Tilia sp.</i>         | Pancevo           | 210.27        | 51.68         | 0.96        | 6.41        | 265.62        | 40.91         | 0.47           | 0.50           | 33.72        | 18.66         |
|                          | Smederevo         | 188.29        | 80.27         | 1.29        | 3.15        | 340.72        | 38.48         | 0.46           | 0.31           | 46.45        | 17.93         |
|                          | Obrenovac         | 84.77         | 92.16         | 0.46        | 4.20        | 101.69        | 15.85         | 0.65           | 0.41           | 67.06        | 23.16         |
|                          | Belgrade I        | 142.75        | 489.31        | 0.62        | 5.46        | 206.47        | 25.33         | 0.64           | 0.60           | 77.34        | 36.15         |
|                          | Belgrade II       | 125.77        | 195.98        | 0.76        | 6.32        | 167.24        | 48.91         | 0.68           | 0.39           | 61.44        | 15.56         |
| <b>Average</b>           | <b>Study area</b> | <b>150.37</b> | <b>181.88</b> | <b>0.82</b> | <b>5.11</b> | <b>216.35</b> | <b>33.90</b>  | <b>0.58</b>    | <b>0.44</b>    | <b>57.20</b> | <b>22.29</b>  |
| <b>Std Dev</b>           |                   | <b>49.98</b>  | <b>180.30</b> | <b>0.32</b> | <b>1.41</b> | <b>91.59</b>  | <b>13.18</b>  | <b>0.11</b>    | <b>0.11</b>    | <b>17.23</b> | <b>8.22</b>   |
| <i>J. regia</i>          | Pancevo           | 115.99        | 196.50        | 0.99        | 4.54        | 155.02        | 45.03         | 0.52           | 0.43           | 36.67        | 17.12         |
|                          | Smederevo         | 135.66        | 248.25        | 1.13        | 4.16        | 327.99        | 24.13         | 0.49           | 0.27           | 52.90        | 18.49         |
|                          | Obrenovac         | 115.58        | 178.65        | 0.66        | 5.65        | 192.95        | 56.21         | 0.70           | 0.44           | 62.72        | 23.92         |
|                          | Belgrade I        | 103.26        | 138.30        | 0.45        | 4.78        | 131.35        | 122.38        | 0.77           | 0.43           | 112.98       | 39.03         |
|                          | Belgrade II       | 107.41        | 139.35        | 0.72        | 9.12        | 157.42        | 33.30         | 1.04           | 0.47           | 48.33        | 21.05         |
| <b>Average</b>           | <b>Study area</b> | <b>115.58</b> | <b>180.21</b> | <b>0.79</b> | <b>5.65</b> | <b>192.95</b> | <b>56.21</b>  | <b>0.70</b>    | <b>0.41</b>    | <b>62.72</b> | <b>23.92</b>  |
| <b>Std Dev</b>           |                   | <b>12.47</b>  | <b>45.61</b>  | <b>0.27</b> | <b>2.01</b> | <b>78.63</b>  | <b>38.91</b>  | <b>0.22</b>    | <b>0.08</b>    | <b>29.61</b> | <b>8.84</b>   |
| <i>A. hippocastanum</i>  | Pancevo           | 265.58        | 35.08         | 0.66        | 5.34        | 324.27        | 66.84         | 0.71           | < dl           | 35.96        | 16.10         |
|                          | Smederevo         | 203.53        | 158.44        | 0.97        | 2.84        | 449.16        | 39.43         | < dl           | < dl           | 48.43        | 15.42         |
|                          | Obrenovac         | 141.84        | 63.67         | 0.43        | 4.83        | 203.52        | 20.98         | < dl           | < dl           | 30.88        | 14.27         |
|                          | Belgrade I        | 293.43        | 123.42        | 0.58        | 16.04       | 644.07        | 72.98         | 0.97           | < dl           | 90.84        | 42.52         |
|                          | Belgrade II       | 153.22        | 54.29         | 0.48        | 10.44       | 226.58        | 27.62         | 0.91           | < dl           | 50.23        | 18.90         |
| <b>Average</b>           | <b>Study area</b> | <b>211.52</b> | <b>86.98</b>  | <b>0.62</b> | <b>7.90</b> | <b>369.52</b> | <b>45.57</b>  | <b>0.52</b>    | <b>&lt; dl</b> | <b>51.27</b> | <b>21.44</b>  |
| <b>Std Dev</b>           |                   | <b>66.99</b>  | <b>51.81</b>  | <b>0.21</b> | <b>5.34</b> | <b>181.49</b> | <b>23.28</b>  | <b>0.48</b>    | <b>0.00</b>    | <b>23.59</b> | <b>11.91</b>  |
| <i>P. acerifolia</i>     | Pancevo           | 121.39        | 36.17         | 1.03        | 4.75        | 140.07        | 62.58         | 0.45           | < dl           | 52.89        | 9.25          |
|                          | Smederevo         | 123.32        | 87.92         | 1.00        | 2.33        | 280.89        | 26.11         | 0.51           | < dl           | 28.74        | 11.73         |
|                          | Obrenovac         | 77.34         | 72.51         | 0.83        | 4.08        | 104.87        | 51.37         | 0.56           | < dl           | 34.54        | 16.70         |
|                          | Belgrade I        | 118.92        | 59.44         | 2.14        | 15.52       | 211.40        | 27.36         | 0.91           | < dl           | 106.23       | 23.68         |
|                          | Belgrade II       | 111.98        | 53.59         | 0.73        | 7.45        | 161.52        | 51.66         | 0.68           | < dl           | 49.05        | 16.68         |

|                    |                   |               |              |             |             |               |              |             |                |              |              |
|--------------------|-------------------|---------------|--------------|-------------|-------------|---------------|--------------|-------------|----------------|--------------|--------------|
| <b>Average</b>     | <b>Study area</b> | <b>110.59</b> | <b>61.92</b> | <b>1.15</b> | <b>6.83</b> | <b>179.75</b> | <b>43.81</b> | <b>0.62</b> | <b>&lt; dl</b> | <b>54.29</b> | <b>15.61</b> |
| <b>Std Dev</b>     |                   | <b>19.08</b>  | <b>19.54</b> | <b>0.57</b> | <b>5.19</b> | <b>68.46</b>  | <b>16.24</b> | <b>0.18</b> | <b>0.00</b>    | <b>30.70</b> | <b>5.54</b>  |
| <i>P. nigra I</i>  | Pancevo           | 35.66         | 17.75        | 0.50        | 4.49        | 56.17         | 16.34        | 0.47        | 0.40           | 8.22         | 21.33        |
|                    | Smederevo         | 54.97         | 29.51        | 0.82        | 2.80        | 105.05        | 17.64        | 0.69        | 0.26           | 8.36         | 24.61        |
|                    | Obrenovac         | 39.67         | 24.06        | 0.35        | 3.69        | 46.25         | 13.83        | 0.84        | 0.32           | 8.40         | 21.41        |
|                    | Belgrade I        | 53.27         | 22.77        | 1.08        | 3.90        | 71.82         | 23.26        | 0.65        | 0.37           | 9.80         | 26.63        |
|                    | Belgrade II       | 51.36         | 16.23        | 0.40        | 5.06        | 74.11         | 16.58        | 0.57        | 0.79           | 8.77         | 29.40        |
| <b>Average</b>     | <b>Study area</b> | <b>46.99</b>  | <b>22.06</b> | <b>0.63</b> | <b>3.99</b> | <b>70.68</b>  | <b>17.53</b> | <b>0.65</b> | <b>0.43</b>    | <b>8.71</b>  | <b>24.68</b> |
| <b>Std Dev</b>     |                   | <b>8.72</b>   | <b>5.31</b>  | <b>0.31</b> | <b>0.85</b> | <b>22.37</b>  | <b>3.50</b>  | <b>0.14</b> | <b>0.21</b>    | <b>0.64</b>  | <b>3.46</b>  |
| <i>P. nigra II</i> | Pancevo           | 115.34        | 25.84        | 0.94        | 2.93        | 170.29        | 25.57        | 0.50        | 0.43           | 12.49        | 19.28        |
|                    | Smederevo         | 100.10        | 43.89        | 1.24        | 2.56        | 227.29        | 24.84        | 0.49        | 0.34           | 11.34        | 38.85        |
|                    | Obrenovac         | 104.70        | 32.42        | 0.74        | 2.52        | 101.68        | 17.54        | 0.57        | 0.58           | 11.84        | 14.80        |
|                    | Belgrade I        | 107.59        | 57.74        | 1.21        | 3.12        | 152.98        | 45.00        | 0.59        | 0.42           | 18.68        | 29.09        |
|                    | Belgrade II       | 111.43        | 23.42        | 0.74        | 6.53        | 172.66        | 19.09        | 0.56        | 0.93           | 11.50        | 17.09        |
| <b>Average</b>     | <b>Study area</b> | <b>107.83</b> | <b>36.66</b> | <b>0.97</b> | <b>3.53</b> | <b>164.98</b> | <b>26.41</b> | <b>0.54</b> | <b>0.54</b>    | <b>13.17</b> | <b>23.82</b> |
| <b>Std Dev</b>     |                   | <b>5.89</b>   | <b>14.21</b> | <b>0.24</b> | <b>1.69</b> | <b>45.06</b>  | <b>10.97</b> | <b>0.05</b> | <b>0.23</b>    | <b>3.11</b>  | <b>10.01</b> |

**Table S2.** Pearson's correlations between the content of PTEs in leaves and the ecophysiological response of the studied species.

|                   |    | <b>Chl a</b> | <b>Chl b</b> | <b>Chl a+b</b> | <b>Chl a/b</b> | <b>Tot Carot</b> | <b>Fv/Fm</b> |
|-------------------|----|--------------|--------------|----------------|----------------|------------------|--------------|
| <b>Study area</b> | Al | 0.677**      | 0.650**      | 0.673**        | -0.142         | 0.680**          | 0.399**      |
|                   | B  | 0.237        | 0.207        | 0.229          | -0.094         | 0.344*           | 0.252        |
|                   | Cr | 0.219        | 0.254        | 0.232          | -0.107         | 0.202            | 0.279        |
|                   | Cu | 0.383**      | 0.382**      | 0.385**        | -0.088         | 0.437**          | 0.365*       |
|                   | Fe | 0.621**      | 0.604**      | 0.320**        | -0.164         | 0.603**          | 0.289        |
|                   | Mn | 0.169        | 0.201        | 0.181          | -0.230         | 0.229            | 0.236        |
|                   | Ni | -0.121       | -0.060       | -0.102         | -0.176         | -0.072           | -0.092       |
|                   | Pb | -0.244       | -0.163       | -0.219         | -0.286         | -0.215           | -0.380**     |
|                   | Sr | 0.401**      | 0.371*       | 0.394**        | -0.101         | 0.485**          | 0.560**      |
|                   | Zn | -0.049       | -0.095       | -0.064         | 0.279          | -0.034           | 0.056        |

\*\* Correlation is significant at the 0.01 level (2-tailed), \* Correlation is significant at the 0.05 level (2-tailed)

**Table S3.** Content of Chl a, Chl b, Chl a+b, Chl a/b and Tot Carot (mg g<sup>-1</sup> d.w.) and photosynthetic efficiency (Fv/Fm) of selected urban tree species, average and standard deviation (Std Dev).

| Tree species             | Sampling sites    | Chl a       | Chl b       | Chl a+b     | Chl a/b     | Tot carot   | Fv/Fm       |
|--------------------------|-------------------|-------------|-------------|-------------|-------------|-------------|-------------|
| <i>A. platanoides</i>    | Pancevo           | 6.46        | 3.19        | 9.66        | 2.29        | 1.84        | 0.77        |
|                          | Smederevo         | 4.81        | 2.84        | 7.65        | 1.88        | 1.47        | 0.78        |
|                          | Obrenovac         | 6.76        | 3.48        | 10.25       | 2.05        | 1.66        | 0.78        |
|                          | Belgrade I        | 3.04        | 1.51        | 4.55        | 2.28        | 1.04        | 0.77        |
|                          | Belgrade II       | 3.59        | 1.50        | 5.09        | 2.63        | 1.18        | 0.80        |
| <b>Average</b>           | <b>Study area</b> | <b>4.93</b> | <b>2.50</b> | <b>7.44</b> | <b>2.23</b> | <b>1.44</b> | <b>0.77</b> |
| <b>Std Dev</b>           |                   | <b>1.66</b> | <b>0.94</b> | <b>2.58</b> | <b>0.28</b> | <b>0.33</b> | <b>0.02</b> |
| <i>A. pseudoplatanus</i> | Pancevo           | 6.25        | 3.12        | 9.38        | 2.27        | 1.62        | 0.71        |
|                          | Smederevo         | 6.60        | 2.90        | 9.50        | 2.67        | 1.61        | 0.69        |
|                          | Obrenovac         | 4.83        | 2.45        | 7.29        | 2.22        | 1.48        | 0.72        |
|                          | Belgrade I        | 6.42        | 3.15        | 9.57        | 2.25        | 1.90        | 0.75        |
|                          | Belgrade II       | 3.84        | 1.91        | 5.75        | 2.11        | 1.35        | 0.78        |
| <b>Average</b>           | <b>Study area</b> | <b>5.59</b> | <b>2.71</b> | <b>8.30</b> | <b>2.30</b> | <b>1.59</b> | <b>0.73</b> |
| <b>Std Dev</b>           |                   | <b>1.20</b> | <b>0.53</b> | <b>1.71</b> | <b>0.21</b> | <b>0.21</b> | <b>0.03</b> |
| <i>B. pendula</i>        | Pancevo           | 4.58        | 1.74        | 6.31        | 2.72        | 1.38        | 0.79        |
|                          | Smederevo         | 3.60        | 1.76        | 5.36        | 2.38        | 1.14        | 0.78        |
|                          | Obrenovac         | 5.18        | 2.00        | 7.19        | 2.65        | 1.29        | 0.78        |
|                          | Belgrade I        | 3.03        | 1.07        | 4.10        | 3.14        | 0.95        | 0.76        |
|                          | Belgrade II       | 4.34        | 1.80        | 6.15        | 2.81        | 1.20        | 0.82        |
| <b>Average</b>           | <b>Study area</b> | <b>4.15</b> | <b>1.67</b> | <b>5.82</b> | <b>2.74</b> | <b>1.19</b> | <b>0.79</b> |
| <b>Std Dev</b>           |                   | <b>0.84</b> | <b>0.36</b> | <b>1.16</b> | <b>0.28</b> | <b>0.17</b> | <b>0.02</b> |
| <i>Tilia sp.</i>         | Pancevo           | 4.90        | 1.88        | 6.78        | 2.85        | 1.49        | 0.80        |
|                          | Smederevo         | 7.94        | 3.36        | 11.30       | 2.70        | 1.47        | 0.79        |
|                          | Obrenovac         | 2.89        | 1.07        | 3.96        | 3.15        | 0.93        | 0.77        |
|                          | Belgrade I        | 3.76        | 1.46        | 5.22        | 2.65        | 1.22        | 0.69        |
|                          | Belgrade II       | 5.09        | 2.00        | 7.10        | 2.80        | 1.37        | 0.81        |
| <b>Average</b>           | <b>Study area</b> | <b>4.92</b> | <b>1.95</b> | <b>6.87</b> | <b>2.83</b> | <b>1.30</b> | <b>0.77</b> |
| <b>Std Dev</b>           |                   | <b>1.91</b> | <b>0.87</b> | <b>2.78</b> | <b>0.19</b> | <b>0.23</b> | <b>0.05</b> |
| <i>J. regia</i>          | Pancevo           | 3.03        | 1.42        | 4.46        | 2.30        | 1.18        | 0.75        |
|                          | Smederevo         | 4.60        | 2.13        | 6.73        | 2.05        | 1.54        | 0.76        |
|                          | Obrenovac         | 3.56        | 1.74        | 5.23        | 2.09        | 1.33        | 0.76        |
|                          | Belgrade I        | 2.58        | 1.36        | 3.95        | 1.88        | 1.10        | 0.77        |
|                          | Belgrade II       | 4.02        | 2.04        | 6.06        | 2.11        | 1.50        | 0.77        |
| <b>Average</b>           | <b>Study area</b> | <b>3.56</b> | <b>1.74</b> | <b>5.30</b> | <b>2.09</b> | <b>1.33</b> | <b>0.76</b> |
| <b>Std Dev</b>           |                   | <b>0.79</b> | <b>0.35</b> | <b>1.13</b> | <b>0.15</b> | <b>0.19</b> | <b>0.01</b> |
| <i>A. hippocastanum</i>  | Pancevo           | 4.92        | 2.47        | 7.39        | 2.18        | 1.47        | 0.77        |
|                          | Smederevo         | 6.16        | 2.71        | 8.87        | 2.33        | 1.71        | 0.76        |
|                          | Obrenovac         | 5.02        | 2.11        | 7.13        | 2.68        | 1.46        | 0.74        |
|                          | Belgrade I        | 6.63        | 2.71        | 9.34        | 2.76        | 1.76        | 0.76        |
|                          | Belgrade II       | 4.80        | 2.25        | 7.06        | 2.35        | 1.40        | 0.76        |

|                      |                   |             |             |             |             |             |             |
|----------------------|-------------------|-------------|-------------|-------------|-------------|-------------|-------------|
| <b>Average</b>       | <b>Study area</b> | <b>5.51</b> | <b>2.45</b> | <b>7.96</b> | <b>2.46</b> | <b>1.56</b> | <b>0.76</b> |
| <b>Std Dev</b>       |                   | <b>0.83</b> | <b>0.27</b> | <b>1.07</b> | <b>0.24</b> | <b>0.16</b> | <b>0.01</b> |
| <i>P. acerifolia</i> | Pancevo           | 3.61        | 1.43        | 5.04        | 2.67        | 1.14        | 0.78        |
|                      | Smederevo         | 2.16        | 1.07        | 3.23        | 2.60        | 0.70        | 0.73        |
|                      | Obrenovac         | 2.72        | 1.27        | 3.99        | 2.54        | 0.93        | 0.76        |
|                      | Belgrade I        | 3.74        | 1.35        | 5.09        | 3.14        | 1.00        | 0.82        |
|                      | Belgrade II       | 3.13        | 1.10        | 4.23        | 2.81        | 0.82        | 0.79        |
| <b>Average</b>       | <b>Study area</b> | <b>3.07</b> | <b>1.25</b> | <b>4.32</b> | <b>2.75</b> | <b>0.92</b> | <b>0.78</b> |
| <b>Std Dev</b>       |                   | <b>0.65</b> | <b>0.15</b> | <b>0.78</b> | <b>0.24</b> | <b>0.17</b> | <b>0.03</b> |
| <i>P. nigra I</i>    | Pancevo           | 0.79        | 0.30        | 1.08        | 2.85        | 0.26        | 0.54        |
|                      | Smederevo         | 0.96        | 0.38        | 1.34        | 2.69        | 0.31        | 0.61        |
|                      | Obrenovac         | 1.16        | 0.43        | 1.59        | 2.76        | 0.37        | 0.63        |
|                      | Belgrade I        | 1.02        | 0.45        | 1.47        | 2.44        | 0.32        | 0.59        |
|                      | Belgrade II       | 1.06        | 0.54        | 1.60        | 2.28        | 0.33        | 0.69        |
| <b>Average</b>       | <b>Study area</b> | <b>1.00</b> | <b>0.42</b> | <b>1.42</b> | <b>2.60</b> | <b>0.32</b> | <b>0.61</b> |
| <b>Std Dev</b>       |                   | <b>0.14</b> | <b>0.09</b> | <b>0.21</b> | <b>0.24</b> | <b>0.04</b> | <b>0.05</b> |
| <i>P. nigra II</i>   | Pancevo           | 0.77        | 0.32        | 1.10        | 2.62        | 0.25        | 0.49        |
|                      | Smederevo         | 1.05        | 0.43        | 1.48        | 2.82        | 0.34        | 0.49        |
|                      | Obrenovac         | 1.05        | 0.36        | 1.41        | 2.99        | 0.33        | 0.55        |
|                      | Belgrade I        | 0.82        | 0.34        | 1.16        | 2.60        | 0.25        | 0.55        |
|                      | Belgrade II       | 0.87        | 0.46        | 1.33        | 2.12        | 0.28        | 0.62        |
| <b>Average</b>       | <b>Study area</b> | <b>0.91</b> | <b>0.38</b> | <b>1.29</b> | <b>2.63</b> | <b>0.29</b> | <b>0.54</b> |
| <b>Std Dev</b>       |                   | <b>0.13</b> | <b>0.06</b> | <b>0.16</b> | <b>0.33</b> | <b>0.04</b> | <b>0.05</b> |
